# Supplementary material
Source: publisher figshare collection journal article supplement (https://karger.figshare.com/ndownloader/files/5733390)
Supplement: Supplementary file 1 [file 5733390]

| Active ingredient | Beriplex P/N 500® (per 500 IU ampulla, CSL Behring GmbH, Marburg, Germany) | Octaplex® (per 500 IU ampulla, Octapharma, Langenfeld, Germany) | PPSB-Human SD/Nano 600® (per 600 IU ampulla, Octapharma, Langenfeld, Germany) |
| --- | --- | --- | --- |
| Human factor II (IU) | 400 – 960 | 280 – 760 | 800 |
| Human factor VII (IU) | 200 – 500 | 180 – 480 | 275 |
| Human factor IX (IU) | 400 – 620 | 500 | 615 |
| Human factor X (IU) | 440 – 1200 | 360 – 600 | 800 |
| Protein C (IU) | 300 – 900 | 260 – 620 | 300 |
| Protein S (IU) | 240 - 760 | 240 – 640 | 700 |

Supplementary table 1: Content of the 4-factor PCCs that were used in our patients (as provided by the manufacturers). Note, that all PCC products contain the vitamin K-dependent coagulation factors II, IX and X, with variable amounts of factor VII. Based on the relative factor VII content, PCCs are categorized as either 3-factor PCCs (i.e. PCCs without or only very little amounts of factor VII) or 4-factor PCCs (i.e. PCCs including factor VII).
